# Supplementary material for: Piezoelectric coupling in a field-effect transistor with a nanohybrid channel of ZnO nanorods grown vertically on graphene
Source: Royal Society of Chemistry journal article supplement (doi:10.1039/c4nr04713c), 2014-10-22
Supplement: c4nr04713c1.pdf [file c4nr04713c1.pdf]

**SUPPORTING INFORMATION**

**Piezoelectric Coupling in a Field-Effect Transistor  
with a Nanohybrid Channel of ZnO Nanorods  
Grown Vertically on Graphene**

V. Q. Dang,<sup>a</sup> D. -I. Kim,<sup>a</sup> L. T. Duy,<sup>a</sup> B. -Y. Kim,<sup>b</sup> B. -U. Hwang,<sup>a</sup> M. Jang,<sup>b</sup> K. -S. Shin,<sup>a</sup> S. -W. Kim,<sup>a,b</sup> and N. -E. Lee<sup>a,b,c,\*</sup>

\*Corresponding author: [nelee@skku.edu](mailto:nelee@skku.edu)

## ARTICLE

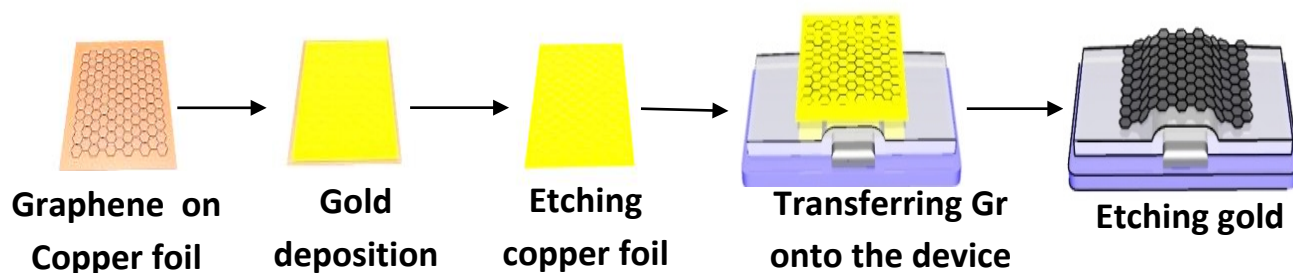

Figure S1. Graphene (Gr) transfer process

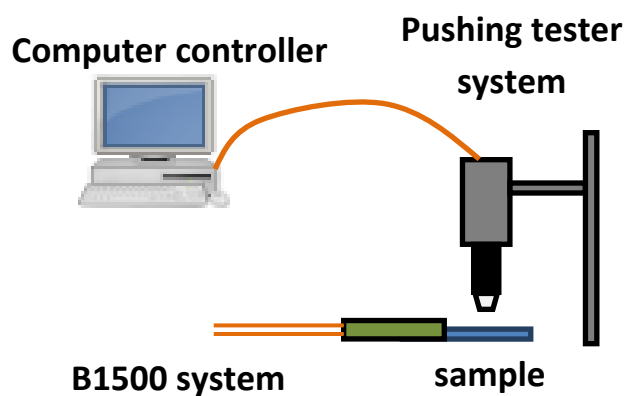

Figure S2. Diagram of pressure sensing measurement system

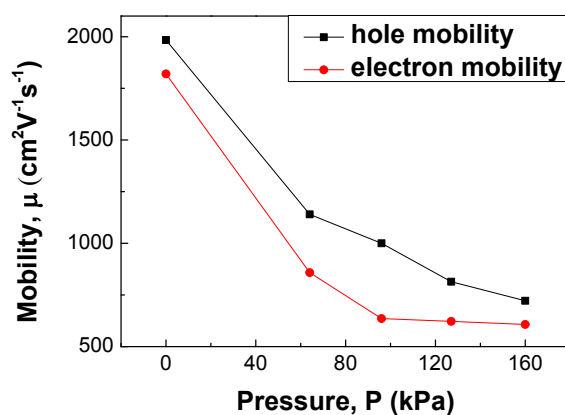

Figure S3. Field-effect channel mobilities of electrons and holes at varying pressure
